# Supplementary material
Source: publisher site journal article supplement (https://www.dovepress.com/article/296676)
Supplement: Supplementary file 1 [file get_supplementary_file.php]

**Supplementary material**

**Supplementary Table 1. Severity grading of histopathology findings following intraarticular, intraperitoneal or gavage delivery of BT2.** Severity of lesions was graded histologically as follows: 0=no abnormalities detected; 1=minimal change; 2=mild change; 3=moderate change; 4=severe change; NA=not assessed. n=5 mice per group. IA denotes intraarticular, IP intraperitoneal. Vehicle was DMSO.

| **Group** | **Control (Untreated)** | | | | |
| --- | --- | --- | --- | --- | --- |
| **Animal** | **Mouse 1** | **Mouse 2** | **Mouse 3** | **Mouse 4** | **Mouse 5** |
| **Liver** | | | | | |
| . inflammation, parenchymal | 1 | 1 | 1 | 1 | 0 |
| . inflammation, peritoneal | 0 | 0 | 0 | 0 | 0 |
| . mineralisation, subcapsular | 0 | 0 | 0 | 0 | 0 |
| **Kidney (left and right)** | | | | | |
| . inflammation, interstitial | 0 | 0 | 0 | 1 | 0 |
| . inflammation, renal pelvis | 0 | 0 | 0 | 0 | 0 |
| **Lung** | | | | | |
| . osseous metaplasia | 0 | 0 | 0 | 0 | 0 |
| **Spleen** | 0 | 0 | 0 | 0 | 0 |
| **Heart** | 0 | 0 | 0 | 0 | 0 |
| **Eye (left and right)** | 0 | 0 | 0 | 0 | 0 |
|  |  |  |  |  |  |
| **Group** | **IA Vehicle** | | | | |
| **Animal** | **Mouse 1** | **Mouse 2** | **Mouse 3** | **Mouse 4** | **Mouse 5** |
| **Liver** | | | | | |
| . inflammation, parenchymal | 1 | 0 | 1 | 1 | 1 |
| . inflammation, peritoneal | 0 | 0 | 0 | 0 | 0 |
| . mineralisation, subcapsular | 0 | 0 | 0 | 0 | 0 |
| **Kidney (left and right)** | | | | | |
| . inflammation, interstitial | 0 | 0 | 0 | 0 | 0 |
| . inflammation, renal pelvis | 0 | 0 | 0 | 0 | 0 |
| **Lung** | | | | | |
| . osseous metaplasia | 0 | 0 | 0 | 0 | 0 |
| **Spleen** | 0 | 0 | 0 | 0 | 0 |
| **Heart** | 0 | 0 | 0 | 0 | 0 |
| **Eye (left and right)** | 0 | 0 | 0 | 0 | 0 |
|  |  |  |  |  |  |
| **Group** | **IA BT2 3 mg/kg** | | | | |
| **Animal** | **Mouse 1** | **Mouse 2** | **Mouse 3** | **Mouse 4** | **Mouse 5** |
| **Liver** | | | | | |
| . inflammation, parenchymal | 1 | 1 | 1 | 1 | 0 |
| . inflammation, peritoneal | 0 | 0 | 0 | 0 | 0 |
| . mineralisation, subcapsular | 0 | 0 | 0 | 0 | 0 |
| **Kidney (left and right)** | | | | | |
| . inflammation, interstitial | 0 | 1 | 0 | 0 | 0 |
| . inflammation, renal pelvis | 2 | 0 | 0 | 0 | 0 |
| **Lung** | | | | | |
| . osseous metaplasia | 0 | 0 | 0 | 0 | 0 |
| **Spleen** | 0 | 0 | 0 | 0 | 0 |
| **Heart** | 0 | 0 | 0 | 0 | 0 |
| **Eye (left and right)** | 0 | 0 | 0 | 0 | 0 |

| **Group** | **IA BT2 30 mg/kg** | | | | |
| --- | --- | --- | --- | --- | --- |
| **Animal** | **Mouse 1** | **Mouse 2** | **Mouse 3** | **Mouse 4** | **Mouse 5** |
| **Liver** | | | | | |
| . inflammation, parenchymal | 1 | 1 | 1 | 1 | 1 |
| . inflammation, peritoneal | 0 | 0 | 0 | 0 | 0 |
| . mineralisation, subcapsular | 0 | 0 | 0 | 0 | 0 |
| **Kidney (left and right)** | | | | | |
| . inflammation, interstitial | 0 | 0 | 0 | 0 | 0 |
| . inflammation, renal pelvis | 0 | 0 | 0 | 0 | 0 |
| **Lung** | | | | | |
| . osseous metaplasia | 0 | 0 | 0 | 0 | 0 |
| **Spleen** | 0 | 0 | 0 | 0 | 0 |
| **Heart** | 0 | 0 | 0 | 0 | 0 |
| **Eye (left and right)** | 0 | 0 | 0 | 0 | 0 |
|  |  |  |  |  |  |
| **Group** | **IP Vehicle** | | | | |
| **Animal** | **Mouse 1** | **Mouse 2** | **Mouse 3** | **Mouse 4** | **Mouse 5** |
| **Liver** | | | | | |
| . inflammation, parenchymal | 0 | 1 | 1 | 1 | 1 |
| . inflammation, peritoneal | 1 | 2 | 1 | 1 | 1 |
| . mineralisation, subcapsular | 0 | 0 | 0 | 0 | 0 |
| **Kidney (left and right)** | | | | | |
| . inflammation, interstitial | 0 | 0 | 0 | 0 | 0 |
| . inflammation, renal pelvis | 0 | 0 | 0 | 0 | 0 |
| **Lung** | | | | | |
| . osseous metaplasia | 0 | 0 | 0 | 0 | 0 |
| **Spleen** | 0 | 0 | 0 | 0 | 0 |
| **Heart** | 0 | 0 | 0 | 0 | 0 |
| **Eye (left and right)** | 0 | 0 | 0 | 0 | 0 |
|  |  |  |  |  |  |
| **Group** | **IP BT2 3 mg/kg** | | | | |
| **Animal** | **Mouse 1** | **Mouse 2** | **Mouse 3** | **Mouse 4** | **Mouse 5** |
| **Liver** | | | | | |
| . inflammation, parenchymal | 1 | 1 | 0 | 1 | 1 |
| . inflammation, peritoneal | 0 | 0 | 2 | 1 | 1 |
| . mineralisation, subcapsular | 0 | 0 | 0 | 0 | 0 |
| **Kidney (left and right)** | | | | | |
| . inflammation, interstitial | 0 | 0 | 0 | 0 | 0 |
| . inflammation, renal pelvis | 0 | 0 | 0 | 0 | 0 |
| **Lung** | | | | | |
| . osseous metaplasia | 0 | 1 | 0 | 0 | 0 |
| **Spleen** | 0 | 0 | 0 | 0 | 0 |
| **Heart** | 0 | 0 | 0 | 0 | 0 |
| **Eye (left and right)** | 0 | 0 | 0 | 0 | 0 |

| **Group** | **IP BT2 30 mg/kg** | | | | | | |
| --- | --- | --- | --- | --- | --- | --- | --- |
| **Animal** | **Mouse 1** | **Mouse 2** | **Mouse 3** | **Mouse 4** | | **Mouse 5** | |
| **Liver** | | | | | | | |
| . inflammation, parenchymal | 1 | 1 | 1 | 1 | | 2 | |
| . inflammation, peritoneal | 1 | 1 | 2 | 1 | | 2 | |
| . mineralisation, subcapsular | 0 | 1 | 0 | 0 | | 0 | |
| **Kidney (left and right)** | | | | | | | |
| . inflammation, interstitial | 0 | 0 | 0 | 0 | | 0 | |
| . inflammation, renal pelvis | 0 | 0 | 0 | 4 | | 0 | |
| **Lung** | | | | | | | |
| . osseous metaplasia | 0 | 0 | 0 | 0 | | 0 | |
| **Spleen** | 0 | 0 | 0 | 0 | | 0 | |
| **Heart** | 0 | 0 | 0 | 0 | | 0 | |
| **Eye (left and right)** | 0 | 0 | 0 | 0 | | 0 | |
|  |  |  |  |  | |  | |
| **Group** | **Gavage Vehicle** | | | | | | |
| **Animal** | **Mouse 1** | **Mouse 2** | **Mouse 3** | **Mouse 4** | | | **Mouse 5** |
| **Liver** | | | | | | | |
| . inflammation, parenchymal | 1 | 0 | 1 | 1 | | | 1 |
| . inflammation, peritoneal | 0 | 0 | 0 | 0 | | | 0 |
| . mineralisation, subcapsular | 0 | 0 | 0 | 0 | | | 0 |
| **Kidney (left and right)** | | | | | | | |
| . inflammation, interstitial | 0 | 0 | 0 | 0 | | | 0 |
| . inflammation, renal pelvis | 0 | 0 | 0 | 0 | | | 0 |
| **Lung** | | | | | | | |
| . osseous metaplasia | 0 | 0 | 0 | 0 | | | 0 |
| **Spleen** | 0 | 0 | 0 | 0 | | | 0 |
| **Heart** | 0 | 0 | 0 | 0 | | | 0 |
| **Eye (left and right)** | 0 | 0 | 0 | 0 | | | NA |
|  |  |  |  |  | | |  |
| **Group** | **Gavage BT2 3 mg/kg** | | | | | | |
| **Animal** | **Mouse 1** | **Mouse 2** | **Mouse 3** | | **Mouse 4** | | **Mouse 5** |
| **Liver** | | | | | | | |
| . inflammation, parenchymal | 0 | 0 | 0 | | 1 | | 1 |
| . inflammation, peritoneal | 0 | 0 | 0 | | 0 | | 0 |
| . mineralisation, subcapsular | 0 | 0 | 0 | | 0 | | 0 |
| **Kidney (left and right)** | | | | | | | |
| . inflammation, interstitial | 0 | 0 | 0 | | 1 | | 0 |
| . inflammation, renal pelvis | 0 | 0 | 0 | | 0 | | 0 |
| **Lung** | | | | | | | |
| . osseous metaplasia | 0 | 0 | 0 | | 0 | | 0 |
| **Spleen** | 0 | 0 | 0 | | 0 | | 0 |
| **Heart** | 0 | 0 | 0 | | 0 | | 0 |
| **Eye (left and right)** | 0 | 0 | 0 | | 0 | | 0 |

| **Group** | **Gavage BT2 30 mg/kg** | | | | |
| --- | --- | --- | --- | --- | --- |
| **Animal** | **Mouse 1** | **Mouse 2** | **Mouse 3** | **Mouse 4** | **Mouse 5** |
| **Liver** | | | | | |
| . inflammation, parenchymal | 1 | 0 | 0 | 1 | 0 |
| . inflammation, peritoneal | 0 | 0 | 0 | 0 | 0 |
| . mineralisation, subcapsular | 0 | 0 | 0 | 0 | 0 |
| **Kidney (left and right)** | | | | | |
| . inflammation, interstitial | 0 | 0 | 0 | 0 | 0 |
| . inflammation, renal pelvis | 0 | 0 | 0 | 0 | 0 |
| **Lung** | | | | | |
| . osseous metaplasia | 0 | 0 | 0 | 0 | 0 |
| **Spleen** | 0 | 0 | 0 | 0 | 0 |
| **Heart** | 0 | 0 | 0 | 0 | 0 |
| **Eye (left and right)** | 0 | 0 | 0 | 0 | 0 |
